# Supplementary material
Source: ML conference proceedings conference paper supplement (https://openreview.net/forum?id=5Dl1378QutR)
Supplement: supplementary_material [file attachment]

**Algorithm 1: QD-PG****Given:**  $N$ ,  $\text{max\_steps}$ ,  $\text{gradient\_steps\_ratio}$ , BD extraction function  $\xi$ , state descriptor extraction function  $\psi$ **Initialize:** MAP-Elites grid  $\mathbb{M}$ , Replay Buffer  $\mathbb{R}$ ,  $N$  actors  $\{\pi_{\theta_i}\}_{i=\{1,\dots,N\}}$ , 2 critics  $Q_w^D$  and  $Q_v^Q$ , state descriptors archive  $\mathbb{A}$ 

```

total_steps, actor_steps = 0, 0 // Step counters

// Parallel evaluation of the initial population
for j ← 1 to N do
    Play one episode with actor  $\pi_{\theta_j}$  and store all transitions in  $\mathbb{R}$ 
    Get episode length  $T$ , discounted return  $R$  and state descriptors  $\{\psi(s_1), \dots, \psi(s_T)\}$ 
    Store state descriptors  $\{\psi(s_1), \dots, \psi(s_T)\}$  in  $\mathbb{A}$ 
    Compute  $\xi(\theta_j)$  and add the tuple  $(R, \xi(\theta_j), \theta_j)$  in the MAP-Elites grid  $\mathbb{M}$ 
    actor_steps ← actor_steps + T
end

// Main loop
while total_steps < max_steps do
    // Select new generation
    Get  $N$  actors  $\pi_{\theta_i}, i \in \{1, \dots, N\}$  from  $\mathbb{M}$ 
    gradient_steps = int(actor_steps × gradient_steps_ratio)
    actor_steps = 0

    // Perform in parallel population update and evaluation
    for j ← 1 to N do
        // Update the population
        for i ← 1 to gradient_steps do
            Sample batch of  $(s_t, a_t, r_t, s_{t+1}, \psi(s_t))$  from  $\mathbb{R}$ 

            // First half is updated to maximise diversity
            if j ≤ N//2 then
                Compute novelty reward as  $r_t^D$  from  $\psi(s_t)$  and  $\mathbb{A}$ 
                Update  $\pi_{\theta_j}$  for diversity
                Compute the novelty critic gradient locally
                Average novelty critic gradients between threads
                Update novelty critic  $Q_w^D$ 
            end

            // Second half is updated to maximise quality
            else
                Update  $\pi_{\theta_j}$  for quality
                Compute the quality critic gradient locally
                Average quality critic gradients between threads
                Update quality critic  $Q_v^Q$ 
            end
        end

        // Evaluate the updated actors
        Play one episode with actor  $\pi_{\theta_j}$  and store all transitions in  $\mathbb{R}$ 
        Get episode length  $T$ , discounted return  $R$  and state descriptors  $\{\psi(s_1), \dots, \psi(s_T)\}$ 
        Store state descriptors  $\{\psi(s_1), \dots, \psi(s_T)\}$  in  $\mathbb{A}$ 
        Compute  $\xi(\theta_j)$  and add the tuple  $(R, \xi(\theta_j), \theta_j)$  in the MAP-Elites grid  $\mathbb{M}$ 
        actor_steps ← actor_steps + T
    end

    total_steps ← total_steps + actor_steps // Update total time steps
end

```

## B The TD3 Agent

The Twin Delayed Deep Deterministic (TD3) agent Fujimoto et al. (2018) builds upon the Deep Deterministic Policy Gradient (DDPG) agent Lillicrap et al. (2015). It trains a deterministic actor  $\pi_\phi : \mathcal{S} \rightarrow \mathcal{A}$  directly mapping observations to continuous actions and a critic  $Q_\theta : \mathcal{S} \times \mathcal{A} \rightarrow \mathbb{R}$  which takes a state  $s$  and an action  $a$  and estimates the average return from selecting action  $a$  in state  $s$  and then following policy  $\pi_\phi$ . As DDPG, TD3 alternates between policy evaluation and policy improvement so as to maximise the average discounted return. In DDPG, the critic is updated to minimize a temporal difference error during the policy evaluation step which induces an overestimation bias. TD3 corrects for this bias by introducing two critics  $Q_{\theta_1}$  and  $Q_{\theta_2}$ . TD3 plays one step in the environment using its deterministic policy and then stores the observed transition  $(s_t, a_t, r_t, s_{t+1})$  into a replay buffer  $\mathcal{M}$ . Then, it samples a batch of transitions from  $\mathcal{M}$  and updates the critic networks. Half the time it also samples another batch of transitions to update the actor network.

Both critics are updated so as to minimize a loss function which is expressed as a mean squared error between their predictions and a target:

$$L^{critic}(\theta_1, \theta_2) = \sum_{\text{batch}} \sum_{i=1,2} (Q_{\theta_i}(s_t, a_t) - y_t)^2, \quad (6)$$

where the common target  $y_t$  is computed as:

$$y_t = r_t + \gamma \min_{i=1,2} Q_{\theta_i}(s_{t+1}, \pi_\phi(s_{t+1}) + \epsilon), \quad (7)$$

where  $\epsilon \sim \mathcal{N}(0, I)$ .

The Q-value estimation used to compute target  $y_t$  is taken as minimum between both critic predictions thus reducing the overestimation bias. TD3 also adds a small perturbation  $\epsilon$  to the action  $\pi_\phi(s_{t+1})$  so as to smooth the value estimate by bootstrapping similar state-action value estimates.

Every two critics updates, the actor  $\pi_\phi$  is updated using the deterministic policy gradient also used in DDPG Silver et al. (2014). For a state  $s$ , DDPG updates the actor so as to maximise the critic estimation for this state  $s$  and the action  $a = \pi_\phi(s)$  selected by the actor. As there are two critics in TD3, the authors suggest to take the first critic as an arbitrary choice. The actor is updated by minimizing the following loss function:

$$L^{actor}(\phi) = - \sum_{\text{batch}} Q_{\theta_1}(s_t, \pi_\phi(s_t)). \quad (8)$$

Policy evaluation and policy improvement steps are repeated until convergence. TD3 demonstrates state of the art performance on several MUJoCo benchmarks.

## C QD-PG Details

### C.1 Computational details

We consider populations of  $N = 4$  actors for the POINT-MAZE environment and  $N = 10$  actors for ANT-MAZE and ANT-TRAP. We use 1 CPU thread per actor and parallelization is implemented with the Message Passing Interface (MPI) library. Our experiments are run on a standard computer with 10 CPU cores and 100 GB of RAM, although the maximum RAM consumption per experiment at any time never exceeds 10GB due to an efficient and centralized management of the MAP-Elites grid which stores all solutions. An experiment on POINT-MAZE typically takes between 2 and 3 hours while an experiment on ANT-MAZE or ANT-TRAP takes about 2 days. Note that these durations can vary significantly depending on the type of CPU used. We did not use any GPU.

Computational costs of QD-PG mainly come from backpropagation during the update of each agent, and to the interaction between agents and the environment. These costs scale linearly with the population size but, as many other population-based methods, the structure of QD-PG lends itself very well to parallelization. We leverage this property and parallelize our implementation to assign

one agent per CPU thread. Memory consumption also scales linearly with the number of agents. To reduce this consumption, we centralize the MAP-Elites grid on a master worker and distribute data among workers when needed. With these implementation choices, QD-PG only needs a very accessible computational budget for all experiments.

## C.2 MAP-Elites Implementation details

QD-PG uses a MAP-Elites grid as archive of solutions. We assume that the BD space is bounded and can be discretized into an Cartesian grid. We discretize each dimension into  $m$  meshes, see Table 2 for the value of  $m$  depending on the environment. Hence, the number of cells in the MAP-Elites grid equals  $m$  times the number of dimensions of the BD space. When a new solution  $\theta$  is obtained after the mutation phase, we look for the cell corresponding to its BD,  $\xi(\theta)$ . If the cell is empty, the solution is added, otherwise the new solution replaces the solution already contained in the cell if its score  $F(\theta)$  is better than the score of the already contained solution. During selection, we sample solutions uniformly from the MAP-Elites grid.

## C.3 Diversity reward computation

QD-PG optimizes solutions for quality but also for diversity at the state level. The diversity policy gradient updates the solutions so as to encourage them to visit states with novel state descriptors. The novelty of a state descriptor  $\psi(s_t)$  is expressed through a diversity reward  $r_t^D$ . In practice, we maintain a FIFO archive  $\mathbb{A}$  of the state descriptors encountered so far. When a transition  $(s_t, a_t, r_t, s_{t+1}, \psi(s_t))$  is stored in the replay buffer, we also add  $\psi(s_t)$  to  $\mathbb{A}$ . We only add a state descriptor in  $\mathbb{A}$  if its mean Euclidean distance to its  $K$  nearest neighbors is greater than an acceptance threshold. This filtering step enables to keep the archive size reasonable and to facilitate the computation of the  $K$  nearest neighbors. The values of  $K$  and of the threshold are given in Table 2. When a batch of transitions is collected during the update phase, we recompute fresh diversity rewards  $r_t^D$  as the mean Euclidean distance between the sampled state descriptors  $\psi(s_t)$  and their  $K$  nearest neighbors in  $\mathbb{A}$ . These diversity rewards are used instead of standard rewards in sampled transitions  $(s_t, a_t, r_t^D, s_{t+1}, \psi(s_t))$  to compute the diversity policy gradient.

## C.4 QD-PG Hyper-parameters

Table 2 summarizes hyper-parameters used in experiments. Most of these hyper-parameter values are taken from TD3.

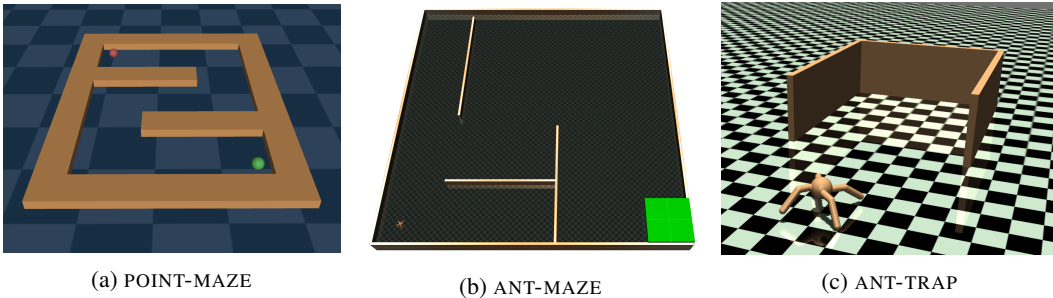

Figure 4: Evaluation environments. Though they may look similar, the state and action spaces in POINT-MAZE are two-dimensional, whereas they are  $29 \times 8$  in ANT-MAZE and  $113 \times 8$  in ANT-TRAP.

## D Environments analysis

In POINT-MAZE, the state and action spaces are two-dimensional. By contrast, in ANT-MAZE and ANT-TRAP, the dimensions of their observation spaces are respectively equal to 29 and 113 while the dimensions of their action spaces are both equal to 8, making these two environments much more challenging as they require larger controllers. The ANT-TRAP environment also differs from mazes as it is open-ended, i.e., the space to be explored by the agent is unlimited, unlike mazes where this

Table 2: QD-PG Hyper-parameters: ANT-MAZE and ANT-TRAP hyper-parameters are identical and grouped under the Ant column

| Parameter                        | PointMaze   | Ant         |
|----------------------------------|-------------|-------------|
| <b>TD3</b>                       |             |             |
| Optimizer                        | SGD         | SGD         |
| Learning rate                    | $6.10^{-3}$ | $3.10^{-4}$ |
| Discount factor $\gamma$         | 0.99        | 0.99        |
| Replay buffer size               | $10^6$      | $5.10^5$    |
| Hidden layers size               | 64/32       | 256/256     |
| Activations                      | ReLU        | ReLU        |
| Minibatch size                   | 256         | 256         |
| Target smoothing coeff.          | 0.005       | 0.005       |
| Delay policy update              | 2           | 2           |
| Target update interval           | 1           | 1           |
| Gradient steps ratio             | 4           | 0.1         |
| <b>State Descriptors Archive</b> |             |             |
| Archive size                     | 10000       | 10000       |
| Threshold of acceptance          | 0.0001      | 0.1         |
| K-nearest neighbors              | 10          | 10          |
| <b>MAP-Elites</b>                |             |             |
| Nb. of bins per dimension        | 5           | 7           |

space is restricted by the walls. In this case, a state descriptor corresponds to the ant position that is clipped to remain in a given range. On the  $y$ -axis, this range is defined as three times the width of the trap. On the  $x$ -axis, this range begins slightly behind the starting position of the ant and is large enough to let it accelerate along this axis. Figure 7b depicts the BD space in ANT-TRAP.

In all environments, state descriptors  $\psi(s_t)$  are defined as the agent’s position at time step  $t$  and behavior descriptors  $\xi(\theta)$  are defined as the agent’s position at the end of a trajectory. Therefore, we have  $\mathcal{B} = \mathcal{D} = \mathbb{R}^2$ ,  $\psi(s_t) = (x_t, y_t)$  and  $\xi(\theta) = (x_T, y_T)$  where  $T$  is the trajectory length. We also take  $\|\cdot\|_{\mathcal{B}}$  and  $\|\cdot\|_{\mathcal{D}}$  as Euclidean distances. This choice does not always satisfy Equation (3) but is convenient in practice and led to satisfactory results. The peculiarity of ANT-TRAP lies in the fact that the reward is expressed as the forward velocity of the ant, thus making the descriptors not totally aligned with the task.

Figure 5 highlights the deceptive nature of the POINT-MAZE and the ANT-MAZE objective functions by depicting gradient fields in both environments. Similarly, the reward is also deceptive in ANT-TRAP.

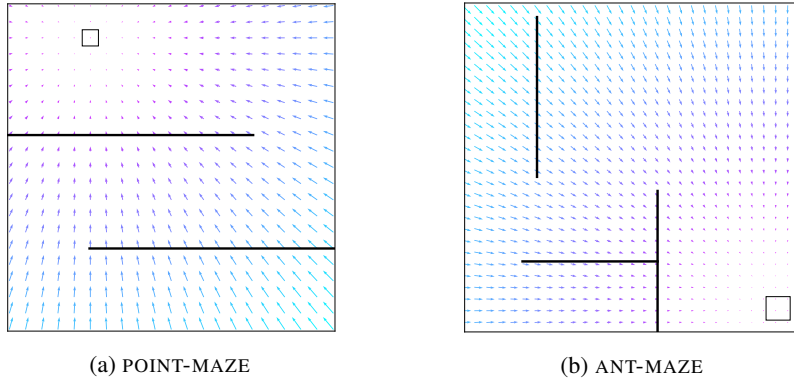

Figure 5: Gradients maps on POINT-MAZE and ANT-MAZE. Black lines are maze walls, arrows depict gradient fields and the square indicates the maze exit. Both settings present deceptive gradients as naively following them leads into a wall.

## E Detailed results

In this section, we provide performance charts corresponding to Table 1b and Table 1a, coverage maps highlighting the exploration capabilities of QD-PG, and detailed results of the fast adaptation experiment. Table 3 summarizes the different components present in QD-PG, its ablations and all baselines.

### E.1 Performance charts

Figure 6 compares QD-PG to competitors on all environments. In QD-PG, the current population of solutions is evaluated every 150.000 time steps in ANT-MAZE and ANT-TRAP, and every 5000 time steps in POINT-MAZE. At evaluation time, agents are set to be deterministic and stop exploring. Figure 6 reports the performance obtained by the best agent in the population at a given time step.

Table 3: Ablations and baselines summary. Selec. stands for selection. The last column assesses whether the method optimizes for a collection instead of a single solution.

|           | Algorithm | QPG | DPG | Q Selec. | D Selec. | Collection |
|-----------|-----------|-----|-----|----------|----------|------------|
| Ablations | QD-PG     | ✓   | ✓   | ✓        | ✓        | ✓          |
|           | QD-PG SUM | ✓   | ✓   | ✓        | ✓        | ✓          |
|           | D-PG      | X   | ✓   | ✓        | ✓        | ✓          |
|           | Q-PG      | ✓   | X   | ✓        | ✓        | ✓          |
| PG        | SAC       | ✓   | X   | X        | X        | X          |
|           | TD3       | ✓   | X   | X        | X        | X          |
|           | RND       | ✓   | ✓   | X        | X        | X          |
|           | CEM-RL    | ✓   | X   | ✓        | X        | ✓          |
| QD        | ME-ES     | X   | X   | ✓        | ✓        | ✓          |
|           | NSR-ES    | X   | X   | ✓        | ✓        | ✓          |
|           | NSRA-ES   | X   | X   | ✓        | ✓        | ✓          |

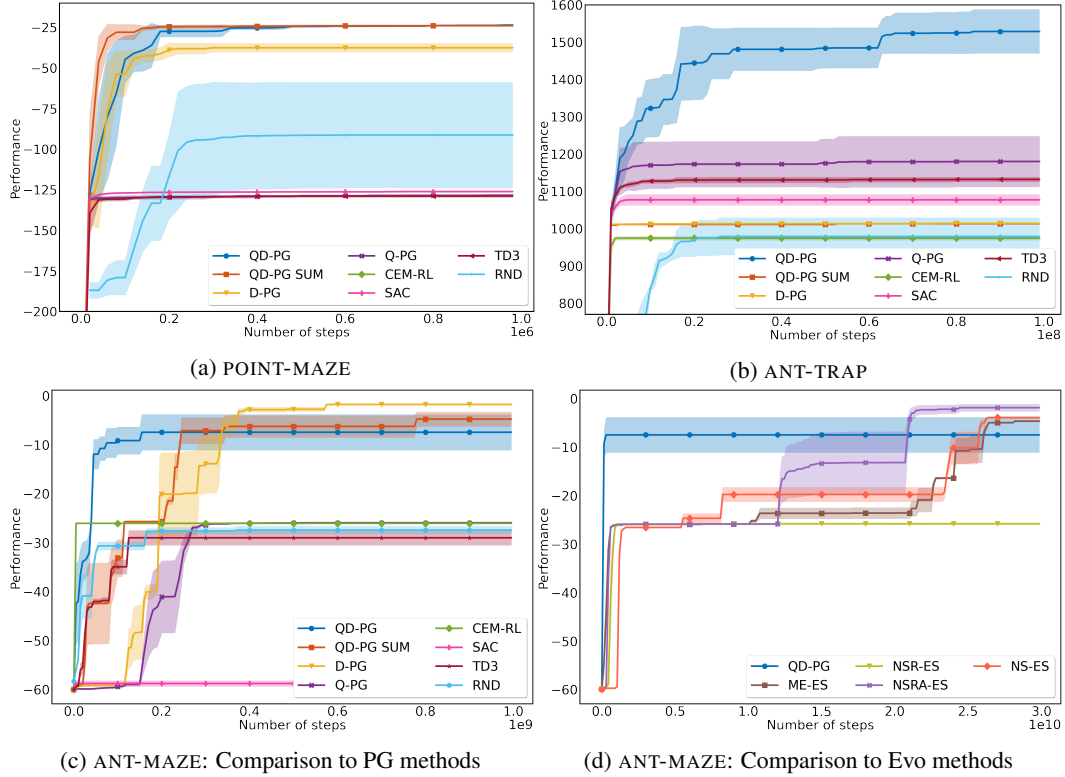

Figure 6: Learning curves of QD-PG versus ablations and baselines. In POINT-MAZE and ANT-TRAP, the performance is the highest return. In ANT-MAZE, it is the negative lowest distance to the goal. We separate the comparison on ANT-MAZE into two graphs for better readability.

## 618 E.2 Coverage Maps

619 Figure 7a shows coverage maps of the POINT-MAZE environment obtained with one representative  
 620 seed by the different algorithms presented in the ablation study (see Table 1a). A dot in the figure  
 621 corresponds to the final position of an agent after an episode. The color spectrum highlights the  
 622 course of training: agents evaluated early in training are in blue while newer ones are represented in  
 623 purple.

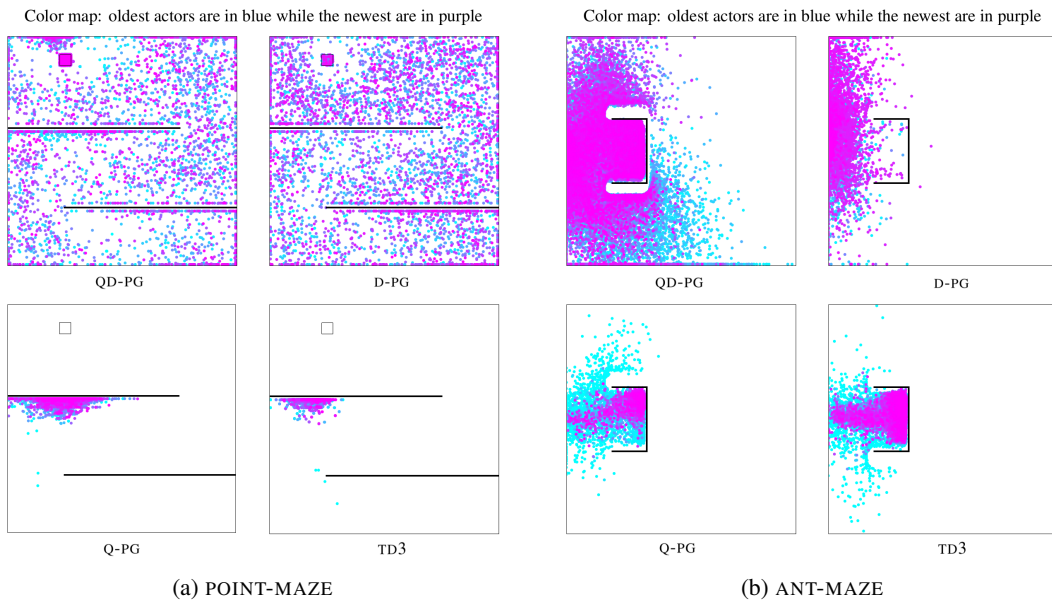

Figure 7: Coverage map of the POINT-MAZE and ANT-TRAP environments for all ablations. Each dot corresponds to the final position of an agent.

624 QD-PG and D-PG almost cover the whole BD space including the objective. Unsurprisingly, Q-PG and  
 625 TD3 present very poor coverage maps, both algorithms optimize only for quality and the MAP-Elites  
 626 selection mechanism in Q-PG contributes nothing in this setting. By contrast, algorithms optimizing  
 627 for diversity (QD-PG and D-PG) find the maze exit. However, as shown in Table 1a, QD-PG which  
 628 also optimizes for quality, is able to refine trajectories through the maze and obtains significantly  
 629 better performance.

630 Figure 7b depicts the coverage maps of the ANT-TRAP environment by QD-PG and TD3. Only QD-PG  
 631 is able to bypass the trap and to cover a large part of the BD space.

## 632 E.3 Fast adaptation

633 The fast adaptation experiment described in Section 7 uses a Bayesian optimization process to quickly  
 634 find a high-performing solution for a new randomly sampled goal. Browsing the MAP-Elites grid in  
 635 an exhaustive way is another option to find a good solution for a new objective. However, the number  
 636 of solutions to be tested with this option increases quadratically w.r.t. the number of meshes used to  
 637 discretize the dimensions of the BD space. As shown in Table 2, we use a  $7 \times 7$  grid to train QD-PG  
 638 in the ANT-MAZE environment, containing a maximum of 49 solutions. In this setting, the difference  
 639 in computation cost between exhaustive search and Bayesian optimization is negligible.

640 To ensure that fast adaptation scales to finely discretized MAP-Elites grids, we reproduce this experi-  
 641 ment with a  $100 \times 100$  grid, thus containing thousands of solutions. We first train QD-PG again on the  
 642 standard objective of ANT-MAZE and obtain a  $100 \times 100$  grid of solutions. Then, we repeat the fast  
 643 adaptation experiment described in Section 7 using this large grid. With a budget of only 50 solutions  
 644 to be tested during the Bayesian optimization process among the thousands of solutions contained in  
 645 the grid, we are able to recover a good solution for the new objective. We repeat this experiment 100  
 646 times, each time with a new random goal, and obtain an average performance of  $-9$  with a standard  
 647 deviation of 7.

Figure 8 maps these 100 fast adaptation experiments to their respective goal location and performance. In each square, we display the score of the best experiment whose goal was sampled in this region of the maze. For instance, the square in the top left corner of the performance map corresponds to one of the 100 fast adaptation experiments that sampled its goal in this part of the maze, and obtained a performance of  $-12$  after testing 50 solutions from the MAP-Elites grid during the Bayesian optimization process. Some squares do not have a score when no experiment sampled its goal in this region of the maze.

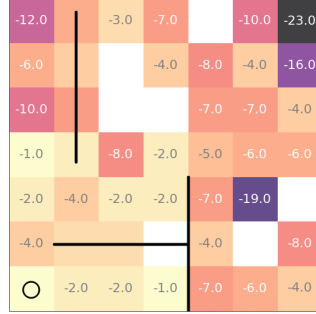

Figure 8: Performance map of 100 fast adaptation experiments in ANT-MAZE. In each square, we display the score of the best experiment whose goal was sampled in this region of the maze, as several experiments may have goals in the same square. White squares correspond to regions where no goal was sampled during the experiments. The black circle shows the agent’s starting position.

## F An alternative Pareto Front approach

QD-PG uses a MAP-Elites grid as a convenient and powerful way to store and select solutions that are both novel and high-performing. Inspired from Cully & Demiris (2017), we also considered the Pareto front as an alternative structure to store and select solutions according to quality and diversity criteria. In this setting, the MAP-Elites grid (see Figure 2b) is replaced by an archive storing all solutions encountered so far with their respective performance and behavior descriptor. At each iteration of the QD-PG algorithm, a quality-diversity Pareto front is computed on the solutions present in the archive, and the  $N$  most novel and high-performing solutions are selected to be updated. Since the archive is evolving at each iteration, the novelty of a solution is recomputed from its behavior descriptor before the computation of the Pareto front.

Results obtained via this alternative method are presented in Table 4. QD-PG PARETO performs similarly to QD-PG MAP-Elites on all environments, but the additional computational cost induced by the Pareto front calculation makes it a slower method than QD-PG MAP-Elites.

Table 4: Comparison of QD-PG MAP-Elites and QD-PG PARETO on all environments.

| Algorithm        | Final Perf. ( $\pm$ std) |             |                |
|------------------|--------------------------|-------------|----------------|
|                  | POINT-MAZE               | ANT-MAZE    | ANT-TRAP       |
| QD-PG MAP-Elites | $-24(\pm 0)$             | $-7(\pm 7)$ | $1541(\pm 86)$ |
| QD-PG PARETO     | $-27(\pm 1)$             | $-4(\pm 3)$ | $1416(\pm 47)$ |

## G Random Network Distillation Details

This section provides additional details on the RND baseline.

### G.1 Details about the agent

The Random Network Distillation (RND) agent extends the Proximal Policy Optimization (PPO) agent to improve its exploration capabilities. RND computes an auxiliary reward  $r_t^i$  called intrinsic motivation reward or, in short, intrinsic reward. In opposition to the reward provided by the environment  $r_t^e$ , called in this case extrinsic reward, the intrinsic reward is used to encourage the agent to visit new states.

## 676 Proximal Policy Optimization

677 PPO is an on-policy actor-critic algorithm using a stochastic policy  $\pi_\theta$  and a value function  $V_\theta$  both  
 678 parameterized by a neural network. It replaces the policy gradient by a surrogate loss to constrain the  
 679 size of policy updates. More formally, the policy parameters are updated to maximise

$$L_\pi(\theta) = \sum_{batch} \min \left( r(\theta) \hat{A}, \text{clip}(r(\theta), 1 - \epsilon, 1 + \epsilon) \hat{A} \right), \quad (9)$$

680 where  $\hat{A}$  is an estimate of the advantage and is computed from the value network  $V_\theta$  using the  
 681 Generalized Advantage Estimation method (GAE) (Schulman et al., 2015). The  $r(\theta)$  term denotes  
 682 the policy ratio  $r(\theta) = \frac{\pi_\theta(a|s)}{\pi_{\theta_{old}}(a|s)}$  where  $\theta_{old}$  are the parameters before the update.

683 The value network is trained to minimize the mean squared error between its prediction and an  
 684 estimation of the return. This estimation can be computed from the advantage estimate. More  
 685 formally, the value function parameters are updated to minimize

$$L_V(\theta) = \sum_{batch} \left( V_\theta(s) - (\hat{A} + V_{\theta_{old}}(s)) \right)^2. \quad (10)$$

## 686 Intrinsic reward computation

687 To compute intrinsic rewards, RND introduces two additional functions  $f_\theta : \mathcal{S} \rightarrow \mathbb{R}^K$  and  $f_{\theta^*} : \mathcal{S} \rightarrow \mathbb{R}^K$   
 688 where  $K$  is a hyper-parameter. Both functions are parameterized by a neural network.  
 689 Parameters  $\theta^*$  are sampled randomly at the beginning of training and are never updated. During  
 690 training, RND updates the parameters  $\theta$  so that  $f_\theta$  imitates  $f_{\theta^*}$  behavior for the states that has been  
 691 visited by the agent. Every time RND updates the PPO policy and value networks, it also updates  $f_\theta$   
 692 so as to minimize

$$L_f(\theta) = \sum_{batch} (f_\theta(s) - f_{\theta^*}(s))^2. \quad (11)$$

693 This way, if for a state  $s$  both functions  $f_\theta$  and  $f_{\theta^*}$  provide close predictions, it means that the agent  
 694 has already visited this state. Therefore, the intrinsic reward is computed as

$$r_t^i = (f_\theta(s_t) - f_{\theta^*}(s_t))^2. \quad (12)$$

695 RND is trained to maximise both the extrinsic rewards obtained from the environment and the intrinsic  
 696 rewards computed by the agent to enhance exploration. RND maintains two value functions  $V^i(s)$   
 697 and  $V^e(s)$  and uses them to compute separately two advantages estimations  $\hat{A}^i$  and  $\hat{A}^e$ . Both value  
 698 functions  $V^i(s)$  and  $V^e(s)$  are updated with Equation (10) where the rewards are respectively taken  
 699 as the intrinsic and extrinsic rewards. The final advantage estimation used to update the policy, see  
 700 Equation (9), is computed as the sum  $\hat{A} = \hat{A}^e + \hat{A}^i$ .

## 701 Implementation tricks

702 In this work, in order to facilitate the comparison between RND and QD-PG, we conditioned functions  
 703  $f_\theta$  and  $f_{\theta^*}$  directly on the states descriptors rather than on the states. Formally, these functions are  
 704 defined as  $f_\theta : \mathcal{D} \rightarrow \mathbb{R}^K$  and  $f_{\theta^*} : \mathcal{D} \rightarrow \mathbb{R}^K$  and the intrinsic reward is computed as

$$r_t^i = (f_\theta(\psi(s_t)) - f_{\theta^*}(\psi(s_t)))^2. \quad (13)$$

## 705 G.2 Additional Results

706 As shown in Table 1a, the RND baseline achieves performance comparable to TD3 on both ANT-MAZE  
 707 and ANT-TRAP environments. However, these results do not reveal that RND is able to extensively  
 708 explore the BD space as depicted in Figure 9. As opposed to conventional RL agents (TD3 and



709 SAC), RND is able to bypass the trap in ANT-TRAP and to cover a large part of the BD space. We  
 710 hypothesize that its poor performance comes from the fact that the agent, although able to bypass the  
 711 trap, does not acquire a sufficient speed along the  $x$ -axis, which is the goal in ANT-TRAP.

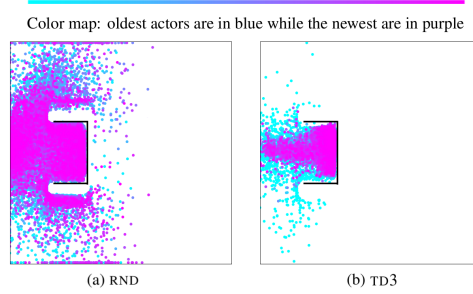

Figure 9: Coverage maps of ANT-TRAP.

### 712 G.3 RND Hyper-parameters

Table 5: RND Hyper-parameters: ANT-MAZE and ANT-TRAP hyper-parameters are identical and grouped under the Ant column

| Parameter            | PointMaze   | Ant         |
|----------------------|-------------|-------------|
| <b>PPO</b>           |             |             |
| Optimizer            | Adam        | Adam        |
| Learning rate        | $5.10^{-4}$ | $5.10^{-5}$ |
| Discount factor      | 0.99        | 0.99        |
| Clipping epsilon     | 0.2         | 0.2         |
| Lambda GAE           | 0.95        | 0.95        |
| Hidden layers size   | 64/64       | 256/256     |
| Activations          | ReLU        | ReLU        |
| Minibatch size       | 512         | 512         |
| Number of epochs     | 30          | 30          |
| <b>RND Networks</b>  |             |             |
| Output dimension $K$ | 16          | 16          |
| Hidden layers size   | 64/64       | 256/256     |
| Learning rate        | $5.10^{-6}$ | $5.10^{-5}$ |
